# Supplementary material for: Specialization in Plant-Hummingbird Networks Is Associated with Species Richness, Contemporary Precipitation and Quaternary Climate-Change Velocity
Source: PLoS One. 2011 Oct 5;6(10):e25891. doi: 10.1371/journal.pone.0025891 (PMC3187835; doi:10.1371/journal.pone.0025891)
Supplement: Table S4 — Correlations between predictor variables. (DOC) [file pone.0025891.s004.doc]

**Table S4. Correlations between predictor variables.** Significance level is corrected for spatial autocorrelation, using Dutilleul’s method [49]. Notice that most variables are non-significantly correlated, and multicollinearity is not a problem in any of our multiple regression models (Table 1; Tables S2-S3). See Table S1 or Materials and Methods for a description of each variable.

|  | **DAYS** | **SIZE** | **MAP** | **MAT** | **SEASP** | **SEAST** | **VELOCITY** |
| --- | --- | --- | --- | --- | --- | --- | --- |
| **DAYS** | ― |  |  |  |  |  |  |
| **SIZE** | +0.46* | ― |  |  |  |  |  |
| **MAP** | -0.19NS | +0.31NS | ― |  |  |  |  |
| **MAT** | +0.35NS | +0.16NS | +0.27NS | ― |  |  |  |
| **SEASP** | +0.34NS | -0.03NS | -0.55* | -0.02NS | ― |  |  |
| **SEAST** | +0.18NS | -0.38NS | -0.47NS | -0.25NS | +0.27NS | ― |  |
| **VELOCITY** | +0.31NS | -0.13NS | -0.31NS | +0.38NS | +0.08NS | +0.32NS | ― |

**P<0.01, *P<0.05, NSP>0.05.
